# Supplementary material for: Differing Impact of Preterm Birth on the Right and Left Atria in Adulthood
Source: PubMed Central journal article supplement (PMC9851437; doi:10.1161/jaha.122.027305), 2022-12-06
Supplement: JAH3-11-e027305-s001.pdf [file JAH3-11-e027305-s001.pdf]

## **SUPPLEMENTAL MATERIAL**

**Table S1. Intraobserver and Interobserver Coefficients of Variation for Left and Right Atrial Parameters.**

|                          | <b>Intraobserver CoV, %</b> | <b>Interobserver CoV, %</b> |
|--------------------------|-----------------------------|-----------------------------|
| <b>Left atrium</b>       |                             |                             |
| Minimal LA volume        | 1.15                        | 16.75                       |
| Maximal LA volume        | 2.15                        | 11.18                       |
| LA stroke volume         | 3.88                        | 8.9                         |
| LA ejection fraction     | 1.74                        | 7.72                        |
| LA reservoir strain      | 3.61                        | 12.24                       |
| LA conduit strain        | 2.42                        | 13.99                       |
| LA booster strain        | 5.83                        | 16.6                        |
| LA reservoir strain rate | 12.61                       | 11.12                       |
| LA conduit strain rate   | 5.21                        | 22.62                       |
| LA booster strain rate   | 13.37                       | 27.77                       |
| <b>Right atrium</b>      |                             |                             |
| Minimal RA volume        | 3.59                        | 17.01                       |
| Maximal RA volume        | 2.03                        | 11.11                       |
| RA stroke volume         | 6.91                        | 21.65                       |
| RA ejection fraction     | 4.49                        | 15.37                       |
| RA reservoir strain      | 4.82                        | 11.94                       |
| RA conduit strain        | 4.82                        | 13.37                       |
| RA booster strain        | 12.61                       | 20.06                       |
| RA reservoir strain rate | 7.80                        | 20.89                       |
| RA conduit strain rate   | 13.33                       | 13.97                       |
| RA booster strain rate   | 23.85                       | 24.42                       |

CoV, coefficient of variation; LA, left atrial; RA, right atrial.

**Table S2. Left and Right Atrial Structure and Function in Preterm-Born and Term-Born Male and Female Participants.**

|                                                 | Male participants (n=227)  |                          |                  | Female participants (n=239) |                          |                  |
|-------------------------------------------------|----------------------------|--------------------------|------------------|-----------------------------|--------------------------|------------------|
|                                                 | Preterm-born adults (n=91) | Term-born adults (n=136) | P value          | Preterm-born adults (n=109) | Term-born adults (n=130) | P value          |
| <b>Left atrium</b>                              |                            |                          |                  |                             |                          |                  |
| Booster strain rate, 1/s                        | -0.82 ± 0.28               | -0.66 ± 0.30             | <b>0.004</b>     | -0.71 ± 0.26                | -0.68 ± 0.24             | 0.539            |
| LA max. volume to LV end-diastolic volume ratio | 0.44 ± 0.10                | 0.40 ± 0.10              | <b>&lt;0.001</b> | 0.45 ± 0.08                 | 0.43 ± 0.09              | <b>0.034</b>     |
| LA stroke volume to LV stroke volume ratio      | 0.45 ± 0.11                | 0.39 ± 0.09              | <b>&lt;0.001</b> | 0.46 ± 0.09                 | 0.44 ± 0.09              | <b>0.014</b>     |
| LA min. volume to LV end-diastolic volume ratio | 0.16 ± 0.05                | 0.15 ± 0.06              | 0.053            | 0.16 ± 0.04                 | 0.14 ± 0.04              | <b>0.031</b>     |
| <b>Right atrium</b>                             |                            |                          |                  |                             |                          |                  |
| Max. volume, mL                                 | 68.5 ± 19.5                | 82.8 ± 19.6              | <b>&lt;0.001</b> | 51.7 ± 14.5                 | 63.2 ± 15.1              | <b>&lt;0.001</b> |
| Min. volume, mL                                 | 35.6 ± 11.8                | 44.3 ± 13.4              | <b>&lt;0.001</b> | 25.4 ± 8.6                  | 32.0 ± 9.5               | <b>&lt;0.001</b> |
| Stroke volume, mL                               | 32.8 ± 12.1                | 38.5 ± 11.6              | <b>&lt;0.001</b> | 26.3 ± 9.3                  | 31.2 ± 8.8               | <b>&lt;0.001</b> |
| Max. volume index, mL/m <sup>2</sup>            | 35.4 ± 9.1                 | 41.9 ± 9.6               | <b>&lt;0.001</b> | 30.6 ± 7.5                  | 36.4 ± 7.5               | <b>&lt;0.001</b> |
| Min. volume index, mL/m <sup>2</sup>            | 18.4 ± 5.8                 | 22.4 ± 6.6               | <b>&lt;0.001</b> | 15.0 ± 4.5                  | 18.4 ± 4.8               | <b>&lt;0.001</b> |
| Stroke volume index, mL/m <sup>2</sup>          | 17.0 ± 5.8                 | 19.5 ± 5.7               | <b>&lt;0.001</b> | 15.6 ± 5.2                  | 17.9 ± 4.7               | <b>&lt;0.001</b> |
| Reservoir strain, %                             | 17.9 ± 3.9                 | 16.9 ± 3.6               | 0.077            | 20.8 ± 4.3                  | 19.9 ± 4.1               | 0.080            |
| Booster strain, %                               | 5.6 ± 2.4                  | 5.1 ± 2.5                | 0.111            | 5.8 ± 2.7                   | 5.2 ± 2.7                | 0.069            |
| Reservoir strain rate, 1/s                      | 0.95 ± 0.27                | 0.89 ± 0.23              | 0.088            | 1.05 ± 0.27                 | 0.97 ± 0.21              | <b>0.022</b>     |
| Conduit strain rate, 1/s                        | -1.09 ± 0.35               | -1.00 ± 0.29             | <b>0.046</b>     | -1.30 ± 0.42                | -1.24 ± 0.35             | 0.283            |
| Booster strain rate, 1/s                        | -0.71 ± 0.24               | -0.67 ± 0.26             | 0.379            | -0.75 ± 0.31                | -0.66 ± 0.29             | <b>0.108</b>     |

|                                                 |             |             |              |             |             |                  |
|-------------------------------------------------|-------------|-------------|--------------|-------------|-------------|------------------|
| RA max. volume to RV end-diastolic volume ratio | 0.42 ± 0.10 | 0.45 ± 0.10 | 0.109        | 0.41 ± 0.09 | 0.44 ± 0.09 | 0.053            |
| RA min. volume to RV end-systolic volume ratio  | 0.52 ± 0.17 | 0.58 ± 0.20 | <b>0.011</b> | 0.48 ± 0.16 | 0.58 ± 0.17 | <b>&lt;0.001</b> |
| RA max. volume to RV end-systolic volume ratio  | 0.99 ± 0.28 | 1.09 ± 0.29 | <b>0.014</b> | 0.98 ± 0.29 | 1.15 ± 0.33 | <b>&lt;0.001</b> |
| RA min. volume to RV end-diastolic volume ratio | 0.11 ± 0.03 | 0.12 ± 0.03 | 0.211        | 0.12 ± 0.03 | 0.13 ± 0.03 | 0.071            |

Group characteristics presented as mean ± SD. P values represent between-group comparisons that were adjusted for differing age distributions using multivariable linear regression. P values in bold indicate statistical significance (P<0.05). LA, left atrial; LV, left ventricular; RA, right atrial; RV, right ventricular.

**Table S3. Multivariable Linear Regression of Left and Right Atrial Structural and Functional Parameters Versus Gestational Age and Birth Weight.**

|                                                    | Gestational age<br>(in weeks) |                  | Birth weight<br>(as z score) |         |
|----------------------------------------------------|-------------------------------|------------------|------------------------------|---------|
|                                                    | B (95% CI)                    | P value          | B (95% CI)                   | P value |
| <b>LA parameters</b>                               |                               |                  |                              |         |
| Booster strain rate, 1/s                           | 0.008<br>(0.000; 0.015)       | 0.052            | 0.020<br>(-0.013; 0.053)     | 0.229   |
| LA max. volume to LV<br>end-diastolic volume ratio | -0.003<br>(-0.005; -0.001)    | <b>&lt;0.001</b> | -0.005<br>(-0.014; 0.003)    | 0.223   |
| LA stroke volume to LV<br>stroke volume ratio      | -0.004<br>(-0.006; -0.002)    | <b>&lt;0.001</b> | 0.000<br>(-0.009; 0.009)     | 0.977   |
| LA min. volume to LV<br>end-diastolic volume ratio | -0.001<br>(-0.002; 0.000)     | <b>0.004</b>     | -0.004<br>(-0.008; 0.001)    | 0.131   |
| <b>RA parameters</b>                               |                               |                  |                              |         |
| Max. volume, mL                                    | 1.518<br>(1.129; 1.907)       | <b>&lt;0.001</b> | 1.104<br>(-0.720; 2.927)     | 0.236   |
| Min. volume, mL                                    | 0.892<br>(0.645; 1.139)       | <b>&lt;0.001</b> | 0.162<br>(-0.999; 1.323)     | 0.784   |
| Stroke volume, mL                                  | 0.626<br>(0.409; 0.844)       | <b>&lt;0.001</b> | 0.941<br>(-0.08; 1.962)      | 0.071   |
| Max. volume index,<br>mL/m <sup>2</sup>            | 0.674<br>(0.497; 0.850)       | <b>&lt;0.001</b> | 0.312<br>(-0.517; 1.142)     | 0.461   |
| Min. volume index, mL/m <sup>2</sup>               | 0.406<br>(0.289; 0.523)       | <b>&lt;0.001</b> | -0.059<br>(-0.607; 0.488)    | 0.832   |
| Stroke volume index,<br>mL/m <sup>2</sup>          | 0.268<br>(0.161; 0.375)       | <b>&lt;0.001</b> | 0.372<br>(-0.130; 0.874)     | 0.147   |
| Reservoir strain, %                                | -0.165<br>(-0.256; -0.075)    | <b>&lt;0.001</b> | 0.094<br>(-0.321; 0.509)     | 0.656   |
| Booster strain, %                                  | -0.060<br>(-0.115; -0.006)    | <b>0.031</b>     | 0.156<br>(-0.094; 0.407)     | 0.222   |
| Reservoir strain rate, 1/s                         | -0.008<br>(-0.013; -0.003)    | <b>0.003</b>     | 0.011<br>(-0.013; 0.036)     | 0.357   |
| Conduit strain rate, 1/s                           | 0.012<br>(0.004; 0.020)       | <b>0.003</b>     | -0.021<br>(-0.057; 0.015)    | 0.262   |
| Booster strain rate, 1/s                           | 0.009<br>(0.001; 0.017)       | <b>0.037</b>     | -0.024<br>(-0.058; 0.009)    | 0.156   |
| RA max. volume to RV<br>end-diastolic volume ratio | 0.002<br>(0.00; 0.004)        | <b>0.022</b>     | 0.005<br>(-0.004; 0.014)     | 0.284   |
| RA min. volume to RV<br>end-systolic volume ratio  | 0.008<br>(0.005; 0.012)       | <b>&lt;0.001</b> | 0.001<br>(-0.016; 0.017)     | 0.934   |
| RA max. volume to RV<br>end-systolic volume ratio  | 0.013<br>(0.007; 0.019)       | <b>&lt;0.001</b> | 0.013<br>(-0.015; 0.041)     | 0.367   |
| RA min. volume to RV<br>end-diastolic volume ratio | 0.000<br>(0.000; 0.001)       | 0.153            | -0.001<br>(-0.004; 0.002)    | 0.540   |

B is the unstandardised regression coefficient and represents the difference in the indicated LA or RA variable per 1-week elevation in gestational age or per 1-z score elevation in birth weight, respectively. P values in bold indicate statistical significance ( $P < 0.05$ ). CI, confidence interval; LA, left atrial; RA, right atrial.

**Table S4. Multivariable Linear Regression of Left and Right Atrial Structural and Functional Parameters Versus Cardiovascular Risk Factors in Preterm-Born and Term-Born Adults.**

|                                                 | Group   | BMI (in kg/m <sup>2</sup> ) |                  | Resting mean arterial pressure (in mmHg) |         | Smoker (yes vs no)         |                  |
|-------------------------------------------------|---------|-----------------------------|------------------|------------------------------------------|---------|----------------------------|------------------|
|                                                 |         | B (95% CI)                  | P value          | B (95% CI)                               | P value | B (95% CI)                 | P value          |
| <b>Left atrium</b>                              |         |                             |                  |                                          |         |                            |                  |
| LA booster strain rate, 1/s                     | Term    | -0.007<br>(-0.020; 0.007)   | 0.337            | 0.000<br>(-0.005; 0.005)                 | 0.978   | -0.121<br>(-0.305; 0.063)  | 0.201            |
|                                                 | Preterm | -0.017<br>(-0.033; -0.001)  | <b>0.037</b>     | -0.001<br>(-0.007; 0.005)                | 0.651   | -0.033<br>(-0.568; 0.503)  | 0.905            |
| LA max. volume to LV end-diastolic volume ratio | Term    | 0.002<br>(-0.002; 0.005)    | 0.356            | 0.001<br>(-0.001; 0.002)                 | 0.268   | 0.088<br>(0.048; 0.127)    | <b>&lt;0.001</b> |
|                                                 | Preterm | 0.002<br>(-0.002; 0.006)    | 0.284            | 0.000<br>(-0.002; 0.002)                 | 0.975   | -0.034<br>(-0.076; 0.008)  | 0.117            |
| LA stroke volume to LV stroke volume ratio      | Term    | 0.000<br>(-0.004; 0.003)    | 0.908            | 0.000<br>(-0.001; 0.001)                 | 0.895   | 0.062<br>(0.023; 0.101)    | <b>0.002</b>     |
|                                                 | Preterm | 0.001<br>(-0.003; 0.005)    | 0.683            | 0.000<br>(-0.002; 0.002)                 | 0.909   | -0.071<br>(-0.115; -0.026) | <b>0.002</b>     |
| LA min. volume to LV end-diastolic volume ratio | Term    | 0.001<br>(-0.001; 0.003)    | 0.393            | 0.000<br>(-0.001; 0.001)                 | 0.589   | 0.049<br>(0.028; 0.069)    | <b>&lt;0.001</b> |
|                                                 | Preterm | 0.001<br>(-0.001; 0.002)    | 0.520            | 0.000<br>(-0.001; 0.001)                 | 0.752   | 0.006<br>(-0.016; 0.028)   | 0.598            |
| <b>Right atrium</b>                             |         |                             |                  |                                          |         |                            |                  |
| RA max. volume, mL                              | Term    | 1.435<br>(0.691; 2.180)     | <b>&lt;0.001</b> | -0.058<br>(-0.349; 0.232)                | 0.695   | -1.171<br>(-9.521; 7.179)  | 0.784            |
|                                                 | Preterm | 1.773<br>(1.075; 2.472)     | <b>&lt;0.001</b> | 0.055<br>(-0.255; 0.366)                 | 0.729   | -2.726<br>(-10.963; 5.512) | 0.517            |

|                                           |         |                            |                  |                            |              |                            |              |
|-------------------------------------------|---------|----------------------------|------------------|----------------------------|--------------|----------------------------|--------------|
| RA min. volume, mL                        | Term    | 0.877<br>(0.39; 1.364)     | <b>&lt;0.001</b> | -0.086<br>(-0.276; 0.104)  | 0.378        | 0.128<br>(-5.337; 5.593)   | 0.964        |
|                                           | Preterm | 0.868<br>(0.446; 1.290)    | <b>&lt;0.001</b> | 0.180<br>(-0.008; 0.368)   | 0.062        | 1.241<br>(-3.739; 6.220)   | 0.626        |
| RA stroke volume, mL                      | Term    | 0.558<br>(0.144; 0.972)    | <b>0.009</b>     | 0.028<br>(-0.134; 0.189)   | 0.738        | -1.299<br>(-5.938; 3.341)  | 0.584        |
|                                           | Preterm | 0.906<br>(0.487; 1.325)    | <b>&lt;0.001</b> | -0.125<br>(-0.311; 0.061)  | 0.191        | -3.966<br>(-8.909; 0.977)  | 0.117        |
| RA max. volume index, mL/m <sup>2</sup>   | Term    | 0.105<br>(-0.237; 0.447)   | 0.548            | -0.059<br>(-0.193; 0.074)  | 0.384        | -0.767<br>(-4.603; 3.070)  | 0.696        |
|                                           | Preterm | 0.503<br>(0.172; 0.833)    | 0.003            | 0.002<br>(-0.145; 0.149)   | 0.977        | -1.576<br>(-5.477; 2.324)  | 0.429        |
| RA min. volume index, mL/m <sup>2</sup>   | Term    | 0.120<br>(-0.110; 0.350)   | 0.306            | -0.057<br>(-0.146; 0.033)  | 0.216        | -0.008<br>(-2.585; 2.569)  | 0.995        |
|                                           | Preterm | 0.238<br>(0.031; 0.444)    | 0.025            | 0.089<br>(-0.003; 0.181)   | 0.059        | 0.563<br>(-1.869; 2.994)   | 0.651        |
| RA stroke volume index, mL/m <sup>2</sup> | Term    | -0.015<br>(-0.219; 0.189)  | 0.884            | -0.003<br>(-0.082; 0.077)  | 0.947        | -0.759<br>(-3.044; 1.527)  | 0.516        |
|                                           | Preterm | 0.265<br>(0.052; 0.479)    | <b>0.016</b>     | -0.087<br>(-0.182; 0.008)  | 0.076        | -2.139<br>(-4.661; 0.384)  | 0.098        |
| RA reservoir strain, %                    | Term    | -0.079<br>(-0.240; 0.083)  | 0.341            | -0.067<br>(-0.128; -0.006) | <b>0.032</b> | 0.502<br>(-1.244; 2.247)   | 0.574        |
|                                           | Preterm | -0.022<br>(-0.224; 0.180)  | 0.834            | -0.099<br>(-0.18; -0.019)  | <b>0.017</b> | -1.054<br>(-3.255; 1.146)  | 0.349        |
| RA booster strain, %                      | Term    | 0.064<br>(-0.035; 0.162)   | 0.206            | 0.040<br>(0.002; 0.077)    | <b>0.038</b> | -1.646<br>(-2.713; -0.579) | <b>0.003</b> |
|                                           | Preterm | 0.009<br>(-0.11; 0.129)    | 0.881            | 0.006<br>(-0.042; 0.054)   | 0.806        | -1.922<br>(-3.225; -0.619) | <b>0.004</b> |
| RA reservoir strain rate, 1/s             | Term    | -0.004<br>(-0.013; 0.005)  | 0.370            | -0.002<br>(-0.005; 0.002)  | 0.316        | -0.001<br>(-0.096; 0.094)  | 0.986        |
|                                           | Preterm | -0.017<br>(-0.030; -0.004) | <b>0.009</b>     | -0.003<br>(-0.008; 0.002)  | 0.217        | -0.124<br>(-0.262; 0.014)  | 0.080        |



|                                                 |         |                           |                  |                            |              |                           |       |
|-------------------------------------------------|---------|---------------------------|------------------|----------------------------|--------------|---------------------------|-------|
| RA conduit strain rate, 1/s                     | Term    | 0.024<br>(0.011; 0.037)   | <b>&lt;0.001</b> | 0.004<br>(-0.001; 0.009)   | 0.086        | -0.109<br>(-0.250; 0.031) | 0.129 |
|                                                 | Preterm | 0.018<br>(0.001; 0.036)   | <b>0.045</b>     | 0.004<br>(-0.003; 0.011)   | 0.257        | 0.047<br>(-0.147; 0.242)  | 0.634 |
| RA booster strain rate, 1/s                     | Term    | -0.001<br>(-0.014; 0.013) | 0.924            | -0.007<br>(-0.012; -0.002) | <b>0.005</b> | 0.161<br>(-0.019; 0.341)  | 0.082 |
|                                                 | Preterm | 0.005<br>(-0.013; 0.023)  | 0.594            | 0.002<br>(-0.004; 0.008)   | 0.510        | -0.239<br>(-0.807; 0.329) | 0.411 |
| RA max. volume to RV end-diastolic volume ratio | Term    | 0.002<br>(-0.002; 0.005)  | 0.311            | 0.000<br>(-0.001; 0.001)   | 0.875        | 0.002<br>(-0.038; 0.042)  | 0.922 |
|                                                 | Preterm | 0.006<br>(0.002; 0.010)   | <b>0.001</b>     | 0.000<br>(-0.001; 0.002)   | 0.791        | -0.027<br>(-0.071; 0.017) | 0.231 |
| RA min. volume to RV end-systolic volume ratio  | Term    | 0.006<br>(-0.001; 0.013)  | 0.099            | 0.000<br>(-0.003; 0.003)   | 0.926        | 0.052<br>(-0.025; 0.13)   | 0.189 |
|                                                 | Preterm | 0.012<br>(0.006; 0.018)   | <b>&lt;0.001</b> | 0.004<br>(0.001; 0.007)    | <b>0.006</b> | 0.027<br>(-0.045; 0.099)  | 0.470 |
| RA max. volume to RV end-systolic volume ratio  | Term    | 0.007<br>(-0.004; 0.019)  | 0.223            | 0.001<br>(-0.003; 0.006)   | 0.568        | 0.069<br>(-0.063; 0.202)  | 0.306 |
|                                                 | Preterm | 0.024<br>(0.013; 0.034)   | <b>&lt;0.001</b> | 0.002<br>(-0.003; 0.006)   | 0.460        | -0.042<br>(-0.166; 0.082) | 0.509 |
| RA min. volume to RV end-diastolic volume ratio | Term    | -0.001<br>(-0.002; 0.000) | <b>0.050</b>     | 0.000<br>(-0.001; 0.000)   | 0.374        | 0.004<br>(-0.010; 0.017)  | 0.621 |
|                                                 | Preterm | 0.000<br>(-0.001; 0.001)  | 0.996            | 0.001<br>(0.000; 0.001)    | <b>0.031</b> | 0.003<br>(-0.012; 0.018)  | 0.741 |

B is the unstandardised regression coefficient and represents the difference in the indicated LA or RA variable per 1-unit elevation in BMI (in kg/m<sup>2</sup>), mean arterial blood pressure (in mmHg), or smoking status (yes [1] vs no [0]). P values in bold indicate statistical significance (P<0.05). BMI, body mass index; CI, confidence interval; LA, left atrial; LV, left ventricular; RA, right atrial; RV, right ventricular.

**Table S5. Multivariable Linear Regression of Left Atrial Structural and Functional Parameters Versus Left Ventricular Structural and Functional Parameters in Preterm-Born and Term-Born Adults.**

|                                                 | Group   | LV end-diastolic volume index (in mL/m <sup>2</sup> ) |              | LV mass index (in g/m <sup>2</sup> ) |                  | LV ejection fraction (in %) |              | Heart rate (in b.p.m.)     |                  |
|-------------------------------------------------|---------|-------------------------------------------------------|--------------|--------------------------------------|------------------|-----------------------------|--------------|----------------------------|------------------|
|                                                 |         | B (95% CI)                                            | P value      | B (95% CI)                           | P value          | B (95% CI)                  | P value      | B (95% CI)                 | P value          |
| LA booster strain rate, 1/s                     | Term    | -0.001<br>(-0.005; 0.003)                             | 0.599        | 0.001<br>(-0.005; 0.007)             | 0.803            | -0.004<br>(-0.012; 0.005)   | 0.377        | -0.005<br>(-0.010; -0.001) | <b>0.020</b>     |
|                                                 | Preterm | 0.000<br>(-0.007; 0.007)                              | 0.928        | -0.002<br>(-0.010; 0.006)            | 0.708            | -0.002<br>(-0.011; 0.007)   | 0.672        | -0.011<br>(-0.017; -0.005) | <b>&lt;0.001</b> |
| LA max. volume to LV end-diastolic volume ratio | Term    | -0.002<br>(-0.003; 0.000)                             | <b>0.009</b> | 0.001<br>(0.000; 0.002)              | 0.113            | 0.004<br>(0.001; 0.006)     | <b>0.001</b> | 0.001<br>(0.000; 0.002)    | 0.209            |
|                                                 | Preterm | -0.002<br>(-0.004; -0.001)                            | <b>0.009</b> | 0.001<br>(0.000; 0.003)              | 0.070            | 0.002<br>(0.000; 0.004)     | 0.082        | -0.001<br>(-0.002; 0.001)  | 0.375            |
| LA stroke volume to LV stroke volume ratio      | Term    | -0.001<br>(-0.002; 0.000)                             | <b>0.021</b> | 0.000<br>(-0.001; 0.001)             | 0.982            | -0.001<br>(-0.003; 0.001)   | 0.382        | 0.000<br>(-0.001; 0.001)   | 0.665            |
|                                                 | Preterm | -0.001<br>(-0.003; 0.000)                             | 0.100        | -0.001<br>(-0.002; 0.001)            | 0.439            | -0.003<br>(-0.006; -0.001)  | <b>0.007</b> | -0.001<br>(-0.002; 0.001)  | 0.240            |
| LA min. volume to LV end-diastolic volume ratio | Term    | -0.001<br>(-0.001; 0.000)                             | <b>0.047</b> | 0.001<br>(0.000; 0.002)              | <b>0.004</b>     | 0.001<br>(0.000; 0.002)     | 0.239        | 0.000<br>(0.000; 0.001)    | 0.208            |
|                                                 | Preterm | -0.001<br>(-0.002; 0.000)                             | <b>0.002</b> | 0.002<br>(0.001; 0.003)              | <b>&lt;0.001</b> | 0.000<br>(-0.001; 0.001)    | 0.681        | 0.000<br>(-0.001; 0.000)   | 0.655            |

B is the unstandardised regression coefficient and represents the difference in the indicated LA variable per 1-unit elevation in LV end-diastolic volume index (in mL/m<sup>2</sup>), LV mass index (in g/m<sup>2</sup>), LV ejection fraction (in %) or heart rate (in b.p.m.). P values in bold indicate statistical significance (P<0.05). CI, confidence interval; LA, left atrial; LV, left ventricular.

**Table S6. Multivariable Linear Regression of Right Atrial Structural and Functional Parameters Versus Right Ventricular Structural and Functional Parameters in Preterm-Born and Term-Born Adults.**

|                                           | Group   | RV end-diastolic volume index (in mL/m <sup>2</sup> ) |                  | RV mass index (in g/m <sup>2</sup> ) |              | RV ejection fraction (in %) |         | Heart rate (in b.p.m.)     |              |
|-------------------------------------------|---------|-------------------------------------------------------|------------------|--------------------------------------|--------------|-----------------------------|---------|----------------------------|--------------|
|                                           |         | B (95% CI)                                            | P value          | B (95% CI)                           | P value      | B (95% CI)                  | P value | B (95% CI)                 | P value      |
| RA max. volume, mL                        | Term    | 0.610<br>(0.416; 0.804)                               | <b>&lt;0.001</b> | 0.163<br>(-0.659; 0.985)             | 0.698        | -0.171<br>(-0.574; 0.233)   | 0.408   | -0.209<br>(-0.443; 0.026)  | 0.083        |
|                                           | Preterm | 0.752<br>(0.551; 0.952)                               | <b>&lt;0.001</b> | -0.002<br>(-0.694; 0.690)            | 0.996        | 0.032<br>(-0.293; 0.356)    | 0.849   | -0.020<br>(-0.253; 0.213)  | 0.866        |
| RA min. volume, mL                        | Term    | 0.312<br>(0.183; 0.441)                               | <b>&lt;0.001</b> | 0.639<br>(0.093; 1.184)              | <b>0.023</b> | -0.046<br>(-0.314; 0.221)   | 0.734   | -0.142<br>(-0.298; 0.014)  | 0.075        |
|                                           | Preterm | 0.434<br>(0.313; 0.556)                               | <b>&lt;0.001</b> | 0.044<br>(-0.377; 0.464)             | 0.839        | 0.007<br>(-0.190; 0.204)    | 0.945   | -0.011<br>(-0.152; 0.131)  | 0.884        |
| RA stroke volume, mL                      | Term    | 0.298<br>(0.183; 0.413)                               | <b>&lt;0.001</b> | -0.475<br>(-0.961; 0.010)            | 0.056        | -0.124<br>(-0.362; 0.114)   | 0.308   | -0.067<br>(-0.205; 0.072)  | 0.347        |
|                                           | Preterm | 0.317<br>(0.188; 0.446)                               | <b>&lt;0.001</b> | -0.046<br>(-0.491; 0.400)            | 0.841        | 0.025<br>(-0.184; 0.233)    | 0.817   | -0.010<br>(-0.160; 0.141)  | 0.901        |
| RA max. volume index, mL/m <sup>2</sup>   | Term    | 0.251<br>(0.163; 0.34)                                | <b>&lt;0.001</b> | 0.169<br>(-0.205; 0.544)             | 0.377        | -0.054<br>(-0.238; 0.130)   | 0.565   | -0.112<br>(-0.219; -0.005) | <b>0.041</b> |
|                                           | Preterm | 0.295<br>(0.201; 0.389)                               | <b>&lt;0.001</b> | 0.112<br>(-0.212; 0.435)             | 0.500        | 0.037<br>(-0.115; 0.188)    | 0.633   | -0.022<br>(-0.132; 0.087)  | 0.687        |
| RA min. volume index, mL/m <sup>2</sup>   | Term    | 0.131<br>(0.071; 0.192)                               | <b>&lt;0.001</b> | 0.355<br>(0.100; 0.611)              | <b>0.007</b> | -0.013<br>(-0.139; 0.112)   | 0.837   | -0.074<br>(-0.147; -0.001) | <b>0.048</b> |
|                                           | Preterm | 0.181<br>(0.122; 0.240)                               | <b>&lt;0.001</b> | 0.089<br>(-0.114; 0.292)             | 0.393        | 0.013<br>(-0.082; 0.109)    | 0.784   | -0.011<br>(-0.079; 0.058)  | 0.754        |
| RA stroke volume index, mL/m <sup>2</sup> | Term    | 0.120<br>(0.063; 0.177)                               | <b>&lt;0.001</b> | -0.186<br>(-0.428; 0.055)            | 0.131        | -0.041<br>(-0.159; 0.077)   | 0.499   | -0.038<br>(-0.107; 0.031)  | 0.278        |
|                                           | Preterm | 0.115<br>(0.048; 0.181)                               | <b>&lt;0.001</b> | 0.023<br>(-0.206; 0.251)             | 0.845        | 0.024<br>(-0.083; 0.131)    | 0.667   | -0.012<br>(-0.089; 0.066)  | 0.770        |

|                                                 |         |                            |                  |                            |                  |                            |                  |                            |                  |
|-------------------------------------------------|---------|----------------------------|------------------|----------------------------|------------------|----------------------------|------------------|----------------------------|------------------|
| RA reservoir strain, %                          | Term    | -0.065<br>(-0.112; -0.018) | <b>0.007</b>     | 0.019<br>(-0.172; 0.210)   | 0.848            | 0.127<br>(0.030; 0.223)    | <b>0.011</b>     | -0.039<br>(-0.096; 0.018)  | 0.183            |
|                                                 | Preterm | -0.104<br>(-0.165; -0.043) | <b>0.001</b>     | 0.044<br>(-0.157; 0.245)   | 0.669            | 0.004<br>(-0.088; 0.096)   | 0.933            | 0.035<br>(-0.044; 0.114)   | 0.384            |
| RA booster strain, %                            | Term    | 0.018<br>(-0.012; 0.047)   | 0.242            | -0.229<br>(-0.349; -0.109) | <b>&lt;0.001</b> | 0.019<br>(-0.041; 0.080)   | 0.531            | 0.018<br>(-0.018; 0.054)   | 0.320            |
|                                                 | Preterm | 0.014<br>(-0.021; 0.050)   | 0.429            | -0.205<br>(-0.323; -0.087) | <b>&lt;0.001</b> | -0.032<br>(-0.086; 0.022)  | 0.250            | 0.032<br>(-0.015; 0.078)   | 0.181            |
| RA reservoir strain rate, 1/s                   | Term    | -0.002<br>(-0.004; 0.001)  | 0.150            | -0.007<br>(-0.018; 0.003)  | 0.159            | 0.005<br>(-0.001; 0.010)   | 0.082            | 0.003<br>(-0.001; 0.006)   | 0.116            |
|                                                 | Preterm | -0.005<br>(-0.008; -0.001) | <b>0.027</b>     | 0.000<br>(-0.013; 0.013)   | 0.966            | -0.002<br>(-0.007; 0.004)  | 0.606            | -0.001<br>(-0.006; 0.004)  | 0.751            |
| RA conduit strain rate, 1/s                     | Term    | 0.008<br>(0.004; 0.012)    | <b>&lt;0.001</b> | -0.026<br>(-0.042; -0.010) | <b>0.002</b>     | -0.008<br>(-0.016; 0.000)  | 0.064            | 0.000<br>(-0.005; 0.005)   | 0.974            |
|                                                 | Preterm | 0.006<br>(0.000; 0.012)    | <b>0.039</b>     | -0.010<br>(-0.029; 0.009)  | 0.292            | 0.003<br>(-0.006; 0.011)   | 0.511            | -0.006<br>(-0.014; 0.001)  | 0.099            |
| RA booster strain rate, 1/s                     | Term    | -0.003<br>(-0.006; 0.001)  | 0.19             | 0.018<br>(-0.003; 0.039)   | 0.091            | -0.010<br>(-0.017; -0.003) | <b>0.007</b>     | -0.011<br>(-0.015; -0.006) | <b>&lt;0.001</b> |
|                                                 | Preterm | -0.004<br>(-0.009; 0.001)  | 0.132            | 0.019<br>(0.001; 0.038)    | 0.041            | -0.003<br>(-0.011; 0.004)  | 0.399            | -0.012<br>(-0.019; -0.006) | <b>&lt;0.001</b> |
| RA max. volume to RV end-diastolic volume ratio | Term    | -0.002<br>(-0.003; -0.001) | <b>&lt;0.001</b> | 0.002<br>(-0.002; 0.006)   | 0.366            | 0.000<br>(-0.002; 0.002)   | 0.743            | -0.001<br>(-0.003; 0.000)  | <b>0.036</b>     |
|                                                 | Preterm | -0.001<br>(-0.003; 0.000)  | <b>0.032</b>     | 0.001<br>(-0.003; 0.005)   | 0.658            | 0.000<br>(-0.002; 0.002)   | 0.669            | 0.000<br>(-0.002; 0.001)   | 0.852            |
| RA min. volume to RV end-systolic volume ratio  | Term    | -0.003<br>(-0.004; -0.001) | <b>0.004</b>     | 0.009<br>(0.001; 0.016)    | <b>0.025</b>     | 0.015<br>(0.012; 0.019)    | <b>&lt;0.001</b> | -0.002<br>(-0.004; 0.000)  | 0.082            |
|                                                 | Preterm | -0.001<br>(-0.002; 0.001)  | 0.456            | 0.002<br>(-0.004; 0.008)   | 0.544            | 0.012<br>(0.009; 0.015)    | <b>&lt;0.001</b> | 0.000<br>(-0.002; 0.002)   | 0.981            |
| RA max. volume to RV end-systolic volume ratio  | Term    | -0.005<br>(-0.008; -0.003) | <b>&lt;0.001</b> | 0.005<br>(-0.007; 0.016)   | 0.438            | 0.031<br>(0.025; 0.036)    | <b>&lt;0.001</b> | -0.003<br>(-0.006; 0.000)  | 0.078            |
|                                                 | Preterm | -0.004<br>(-0.007; -0.001) | <b>0.008</b>     | 0.004<br>(-0.005; 0.014)   | 0.379            | 0.025<br>(0.020; 0.029)    | <b>&lt;0.001</b> | -0.001<br>(-0.004; 0.002)  | 0.645            |

|                                                 |         |                           |                  |                          |              |                          |       |                          |       |
|-------------------------------------------------|---------|---------------------------|------------------|--------------------------|--------------|--------------------------|-------|--------------------------|-------|
| RA min. volume to RV end-diastolic volume ratio | Term    | -0.001<br>(-0.001; 0.000) | <b>&lt;0.001</b> | 0.002<br>(0.001; 0.004)  | <b>0.007</b> | 0.000<br>(-0.001; 0.001) | 0.982 | 0.000<br>(-0.001; 0.000) | 0.050 |
|                                                 | Preterm | 0.000<br>(-0.001; 0.000)  | <b>0.024</b>     | 0.001<br>(-0.001; 0.002) | 0.318        | 0.000<br>(-0.001; 0.001) | 0.795 | 0.000<br>(0.000; 0.000)  | 0.976 |

B is the unstandardised regression coefficient and represents the difference in the indicated RA variable per 1-unit elevation in LV end-diastolic volume index (in mL/m<sup>2</sup>), RV mass index (in g/m<sup>2</sup>), RV ejection fraction (in %) or heart rate (in b.p.m.). P values in bold indicate statistical significance (P<0.05). CI, confidence interval; RA, right atrial; RV, right ventricular.

**Table S7. Left and Right Heart Structure and Function in Extremely-to-Very Preterm-Born, Moderately-to-Late Preterm-Born and Term-Born Adults.**

|                                               | <32 weeks<br>(n=95) | ≥32 to <37<br>weeks<br>(n=105) | ≥37 weeks<br>(n=266) | P <sub>1</sub> | P <sub>2</sub> | P <sub>3</sub> |
|-----------------------------------------------|---------------------|--------------------------------|----------------------|----------------|----------------|----------------|
| <b>LV structure and function</b>              |                     |                                |                      |                |                |                |
| End-diastolic volume index, mL/m <sup>2</sup> | 71.2 ± 8.9          | 74.2 ± 11.8                    | 81.0 ± 12.6          | 0.017          | <0.001         | <0.001         |
| End-systolic volume index, mL/m <sup>2</sup>  | 26.1 ± 5.3          | 27.7 ± 6.1                     | 28.8 ± 7.1           | 0.021          | 0.206          | <0.001         |
| Stroke volume index, mL/m <sup>2</sup>        | 45.1 ± 6.7          | 46.5 ± 8.4                     | 52.2 ± 8.2           | 0.122          | <0.001         | <0.001         |
| Myocardial mass index, g/m <sup>2</sup>       | 66.1 ± 11.1         | 62.9 ± 9.3                     | 55.6 ± 9.7           | 0.042          | <0.001         | <0.001         |
| Ejection fraction, %                          | 63.5 ± 5.7          | 62.7 ± 5.5                     | 64.7 ± 5.2           | 0.326          | <b>0.001</b>   | 0.068          |
| <b>RV structure and function</b>              |                     |                                |                      |                |                |                |
| End-diastolic volume index, mL/m <sup>2</sup> | 76.8 ± 11.5         | 80.6 ± 14.7                    | 89.2 ± 14.6          | 0.011          | <0.001         | <0.001         |
| End-systolic volume index, mL/m <sup>2</sup>  | 33.6 ± 7.1          | 34.9 ± 8.3                     | 36.3 ± 8.9           | 0.107          | 0.258          | <b>0.004</b>   |
| Stroke volume index, mL/m <sup>2</sup>        | 43.2 ± 9.0          | 45.7 ± 10.1                    | 52.9 ± 8.2           | 0.033          | <0.001         | <0.001         |
| Myocardial mass index, g/m <sup>2</sup>       | 23.9 ± 3.8          | 21.0 ± 3.3                     | 19.4 ± 3.1           | <0.001         | <0.001         | <0.001         |
| Ejection fraction, %                          | 56.1 ± 7.4          | 56.6 ± 6.9                     | 59.6 ± 5.5           | 0.598          | <0.001         | <0.001         |
| <b>LA structure and function</b>              |                     |                                |                      |                |                |                |
| Max. volume, mL                               | 56.6 ± 13.5         | 60.1 ± 18.2                    | 61.9 ± 17.6          | 0.047          | 0.759          | <b>0.008</b>   |
| Min. volume, mL                               | 21.0 ± 6.7          | 21.1 ± 8.7                     | 22.3 ± 8.8           | 0.602          | 0.537          | 0.206          |
| Stroke volume, mL                             | 35.7 ± 9.0          | 39.0 ± 10.9                    | 39.6 ± 10.6          | <b>0.006</b>   | 0.989          | <b>0.001</b>   |
| Max. volume index, mL/m <sup>2</sup>          | 32.0 ± 7.1          | 32.9 ± 8.1                     | 33.3 ± 8.6           | 0.325          | 0.876          | 0.215          |
| Min. volume index, mL/m <sup>2</sup>          | 11.8 ± 3.5          | 11.5 ± 4.0                     | 11.9 ± 4.4           | 0.671          | 0.552          | 0.872          |
| Stroke volume index, mL/m <sup>2</sup>        | 20.2 ± 4.9          | 21.4 ± 5.0                     | 21.4 ± 5.3           | 0.065          | 0.821          | 0.066          |
| Ejection fraction, %                          | 63.2 ± 7.1          | 65.6 ± 6.0                     | 64.8 ± 7.2           | 0.014          | 0.374          | 0.065          |
| Reservoir strain, %                           | 19.8 ± 3.2          | 20.1 ± 2.8                     | 20.1 ± 3.2           | 0.856          | 0.491          | 0.416          |
| Conduit strain, %                             | 15.7 ± 2.9          | 15.2 ± 2.7                     | 15.7 ± 3.0           | 0.104          | 0.027          | 0.821          |
| Booster strain, %                             | 5.4 ± 2.0           | 6.4 ± 2.0                      | 5.8 ± 1.9            | <b>0.001</b>   | 0.014          | 0.107          |
| Reservoir strain rate, 1/s                    | 0.89 ± 0.17         | 0.90 ± 0.16                    | 0.92 ± 0.19          | 0.910          | 0.127          | 0.137          |
| Conduit strain rate, 1/s                      | -1.55 ± 0.34        | -1.54 ± 0.36                   | -1.50 ± 0.72         | 0.768          | 0.854          | 0.650          |
| Booster strain rate, 1/s                      | -0.73 ± 0.28        | -0.76 ± 0.27                   | -0.67 ± 0.27         | 0.627          | 0.017          | 0.238          |

|                                                 |              |              |              |              |                  |                  |
|-------------------------------------------------|--------------|--------------|--------------|--------------|------------------|------------------|
| LA max. volume to LV end-diastolic volume ratio | 0.45 ± 0.09  | 0.44 ± 0.09  | 0.41 ± 0.96  | 0.626        | <b>0.004</b>     | <b>&lt;0.001</b> |
| LA min. volume to LV end-systolic volume ratio  | 0.47 ± 0.16  | 0.42 ± 0.15  | 0.43 ± 0.17  | 0.055        | 0.808            | 0.063            |
| LA stroke volume to LV stroke volume ratio      | 0.45 ± 0.10  | 0.47 ± 0.10  | 0.41 ± 0.09  | 0.271        | <b>&lt;0.001</b> | <b>&lt;0.001</b> |
| LA max. volume to LV end-systolic volume ratio  | 1.27 ± 0.36  | 1.22 ± 0.33  | 1.21 ± 0.38  | 0.331        | 0.706            | 0.152            |
| LA min. volume to LV end-diastolic volume ratio | 0.17 ± 0.05  | 0.15 ± 0.05  | 0.15 ± 0.05  | 0.093        | 0.168            | <b>0.001</b>     |
| <b>RA structure and function</b>                |              |              |              |              |                  |                  |
| Max. volume, mL                                 | 57.6 ± 17.9  | 61.0 ± 19.7  | 73.2 ± 20.1  | 0.046        | <b>&lt;0.001</b> | <b>&lt;0.001</b> |
| Min. volume, mL                                 | 28.9 ± 10.8  | 31.1 ± 11.8  | 38.3 ± 13.1  | 0.035        | <b>&lt;0.001</b> | <b>&lt;0.001</b> |
| Stroke volume, mL                               | 28.7 ± 11.2  | 29.9 ± 11.1  | 34.9 ± 10.9  | 0.247        | <b>&lt;0.001</b> | <b>&lt;0.001</b> |
| Max. volume index, mL/m <sup>2</sup>            | 32.2 ± 8.7   | 33.3 ± 8.5   | 39.2 ± 9.1   | 0.221        | <b>&lt;0.001</b> | <b>&lt;0.001</b> |
| Min. volume index, mL/m <sup>2</sup>            | 16.2 ± 5.4   | 16.9 ± 5.4   | 20.4 ± 6.1   | 0.165        | <b>&lt;0.001</b> | <b>&lt;0.001</b> |
| Stroke volume index, mL/m <sup>2</sup>          | 16.1 ± 5.9   | 16.4 ± 5.2   | 18.7 ± 5.3   | 0.591        | <b>&lt;0.001</b> | <b>&lt;0.001</b> |
| Ejection fraction, %                            | 49.4 ± 10.6  | 49.3 ± 10.4  | 48.0 ± 8.8   | 0.779        | 0.389            | 0.248            |
| Reservoir strain, %                             | 20.0 ± 4.2   | 19.1 ± 4.5   | 18.3 ± 4.1   | 0.092        | 0.253            | <b>0.001</b>     |
| Conduit strain, %                               | 15.2 ± 3.6   | 13.8 ± 4.6   | 13.9 ± 3.7   | <b>0.007</b> | 0.453            | <b>0.005</b>     |
| Booster strain, %                               | 5.4 ± 2.4    | 6.0 ± 2.6    | 5.2 ± 2.6    | 0.099        | <b>0.003</b>     | 0.374            |
| Reservoir strain rate, 1/s                      | 0.97 ± 0.26  | 1.03 ± 0.29  | 0.93 ± 0.22  | 0.229        | <b>0.002</b>     | 0.182            |
| Conduit strain rate, 1/s                        | -1.23 ± 0.35 | -1.18 ± 0.44 | -1.11 ± 0.34 | 0.218        | 0.312            | <b>0.007</b>     |
| Booster strain rate, 1/s                        | -0.72 ± 0.30 | -0.74 ± 0.28 | -0.66 ± 0.27 | 0.832        | 0.059            | 0.256            |
| RA max. volume to RV end-diastolic volume ratio | 0.42 ± 0.11  | 0.42 ± 0.09  | 0.44 ± 0.09  | 0.718        | 0.018            | 0.092            |
| RA min. volume to RV end-systolic volume ratio  | 0.49 ± 0.17  | 0.50 ± 0.17  | 0.58 ± 0.18  | 0.727        | <b>&lt;0.001</b> | <b>&lt;0.001</b> |
| RA stroke volume to RV stroke volume ratio      | 0.38 ± 0.15  | 0.37 ± 0.13  | 0.36 ± 0.11  | 0.614        | 0.429            | 0.158            |
| RA max. volume to RV end-systolic volume ratio  | 0.99 ± 0.32  | 0.98 ± 0.25  | 1.12 ± 0.31  | 0.780        | <b>&lt;0.001</b> | <b>0.001</b>     |
| RA min. volume to RV end-diastolic volume ratio | 0.12 ± 0.03  | 0.17 ± 0.03  | 0.12 ± 0.03  | 0.455        | 0.028            | 0.239            |

Group characteristics presented as mean  $\pm$  SD. P values represent between-group comparisons that were adjusted for differing sex and age distributions using multivariable linear regression. P<sub>1</sub> represents group comparisons between <32 weeks and  $\geq$ 32-<37 weeks, P<sub>2</sub> represents group comparisons between  $\geq$ 32-<37 weeks and  $\geq$ 37 weeks, and P<sub>3</sub> represents group comparisons between <32 weeks and  $\geq$ 37 weeks. P values in bold indicate statistical significance (P<0.01). LA, left atrial; LV, left ventricular; RA, right atrial; RV, right ventricular.



**Figure S1. Comparisons of Reservoir, Conduit, and Booster Strain Values in Preterm-Born and Term-Born Adults.**

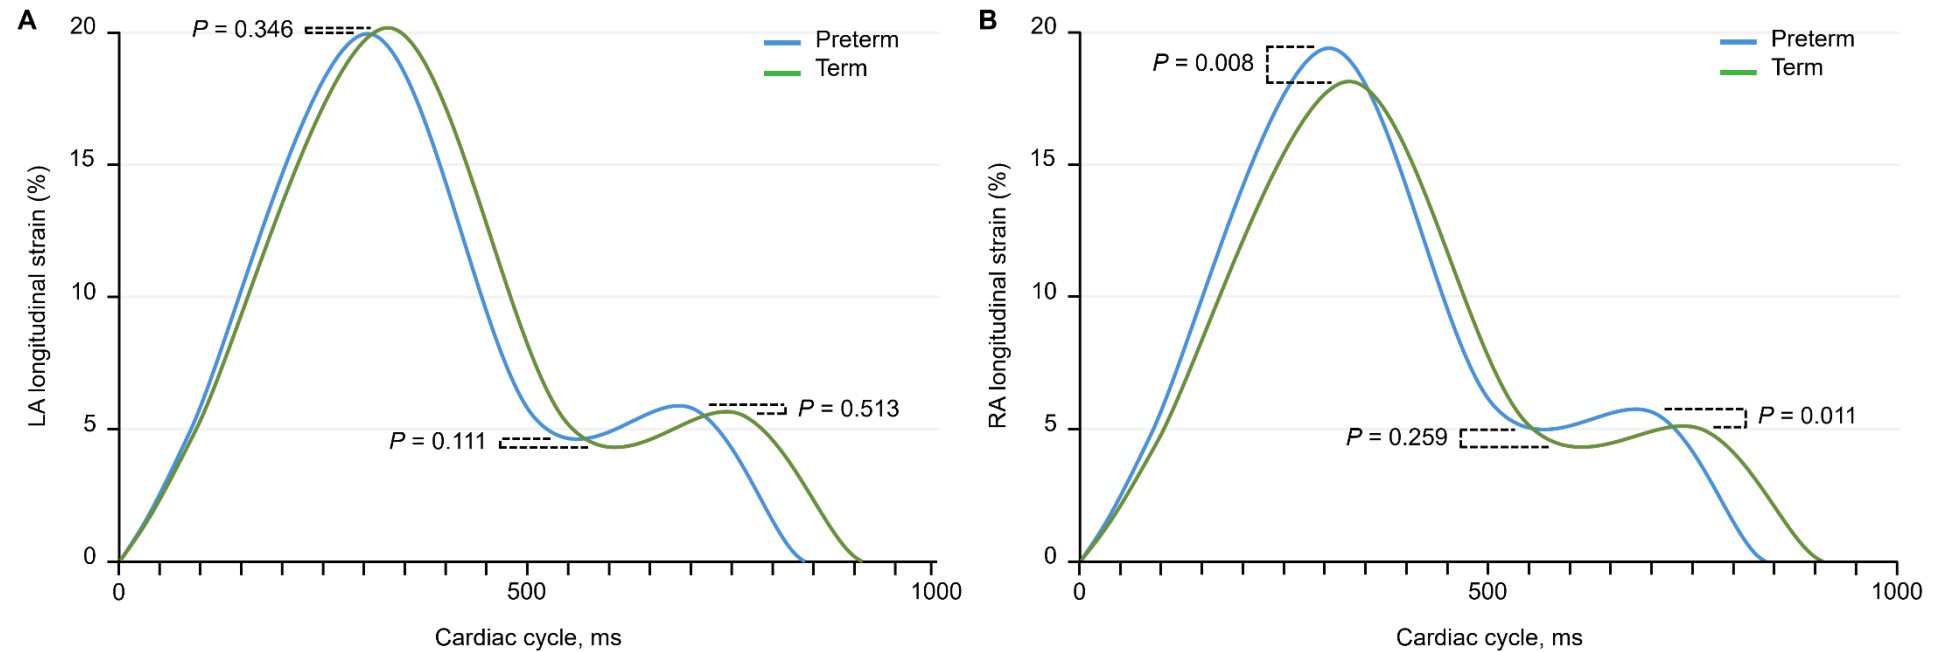

**A**, Visual representation of LA strain in preterm-born and term-born adults. **B**, Visual representation of RA strain in preterm-born and term-born adults. P values represent between-group comparisons for reservoir strain, conduit strain, and booster strain (from left to right, respectively) that were adjusted for differing sex and age distributions using multivariable linear regression. LA, left atrial; RA, right atrial.

**Figure S2. Pooled Left and Right Atrial Strain Curves of Preterm-Born and Term-Born Adults.**

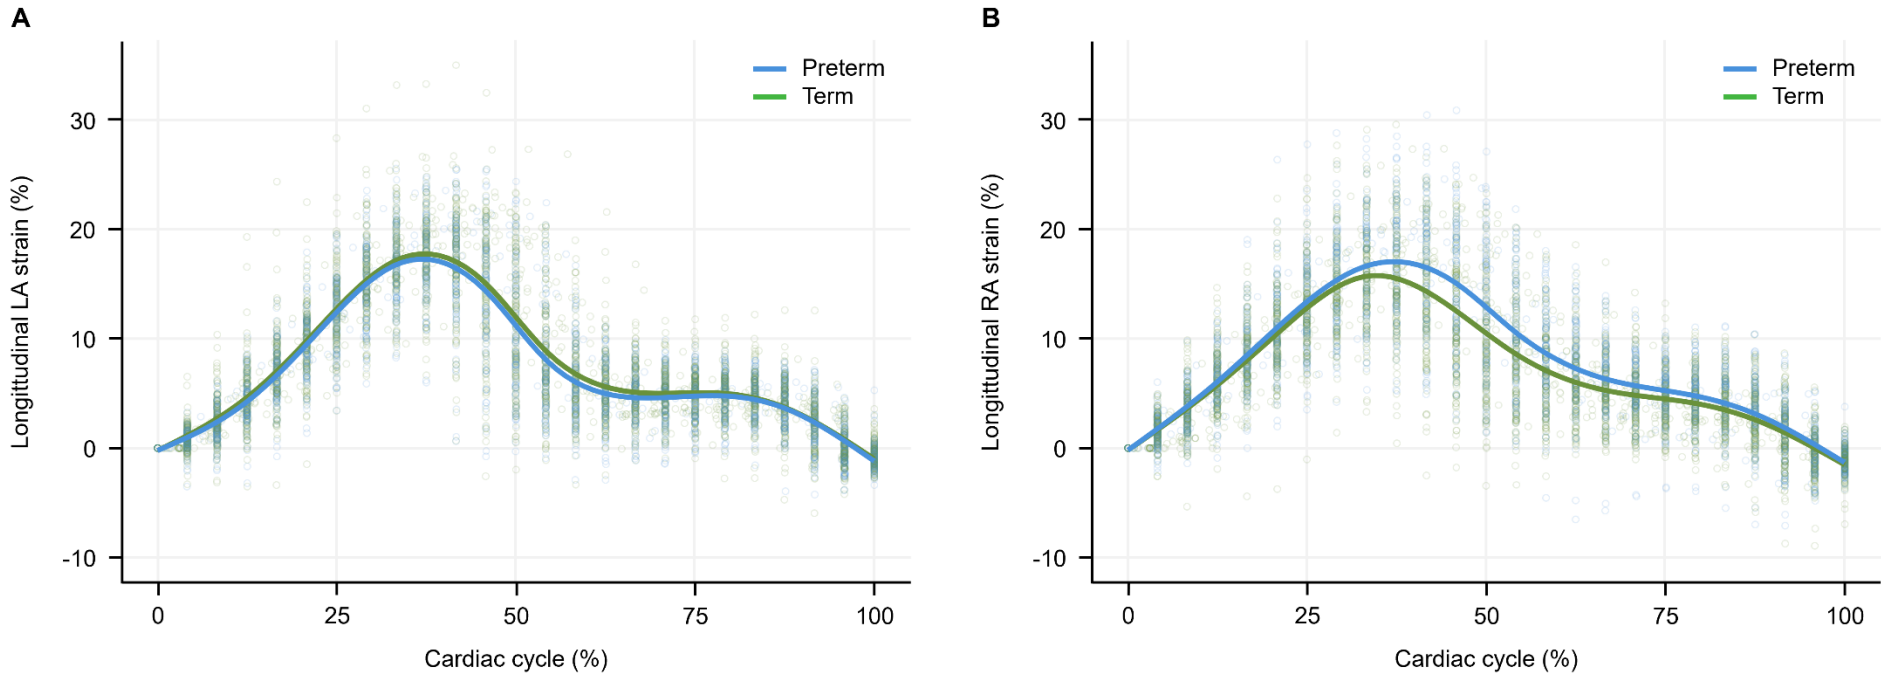

**A**, Pooled LA strain curves of preterm-born and term-born adults. **B**, Pooled RA strain curves in preterm-born and term-born adults. The circles indicate individual strain measurements throughout the cardiac cycle. The full lines indicate the average strain values at each point in the cardiac cycle for preterm-born and term-born adults, separately. LA, left atrial; RA, right atrial.
